# Supplementary material for: Vitrimers trigger covalent bonded bio-silica fused composite materials for recycling, reshaping, and self-healing applications
Source: Royal Society of Chemistry journal article supplement (doi:10.1039/d2ra03794g), 2022-01-01
Supplement: d2ra03794g1.pdf [file d2ra03794g1.pdf]

**Vitrimers based bio-silica fused poly(Eugenol-co-SH) composite materials for recycling, reshaping and self-healing applications.**

Salendra Sriharshitha<sup>1</sup>, Krishnamoorthy Krishnadevi<sup>1,2\*</sup>

<sup>1</sup>Polymer Composites Lab, Division of Chemistry, Department of Sciences & Humanities, Vignan's Foundation for Science, Technology and Research (Deemed to be University), Guntur, Andhra Pradesh, India.

<sup>2</sup>Department of Chemistry, Vignan Degree & PG College, Guntur, Andhra Pradesh, India.

**Supporting Information**

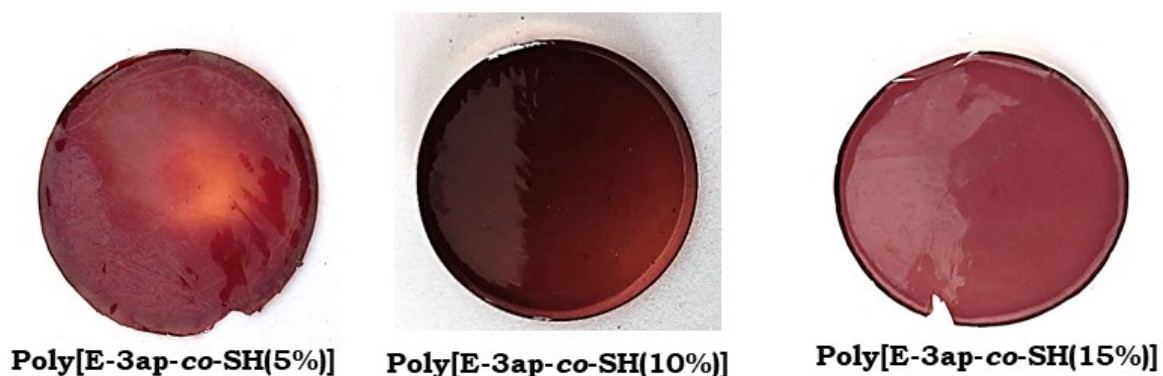

**Figure S1** Photographs of the prepared composites.

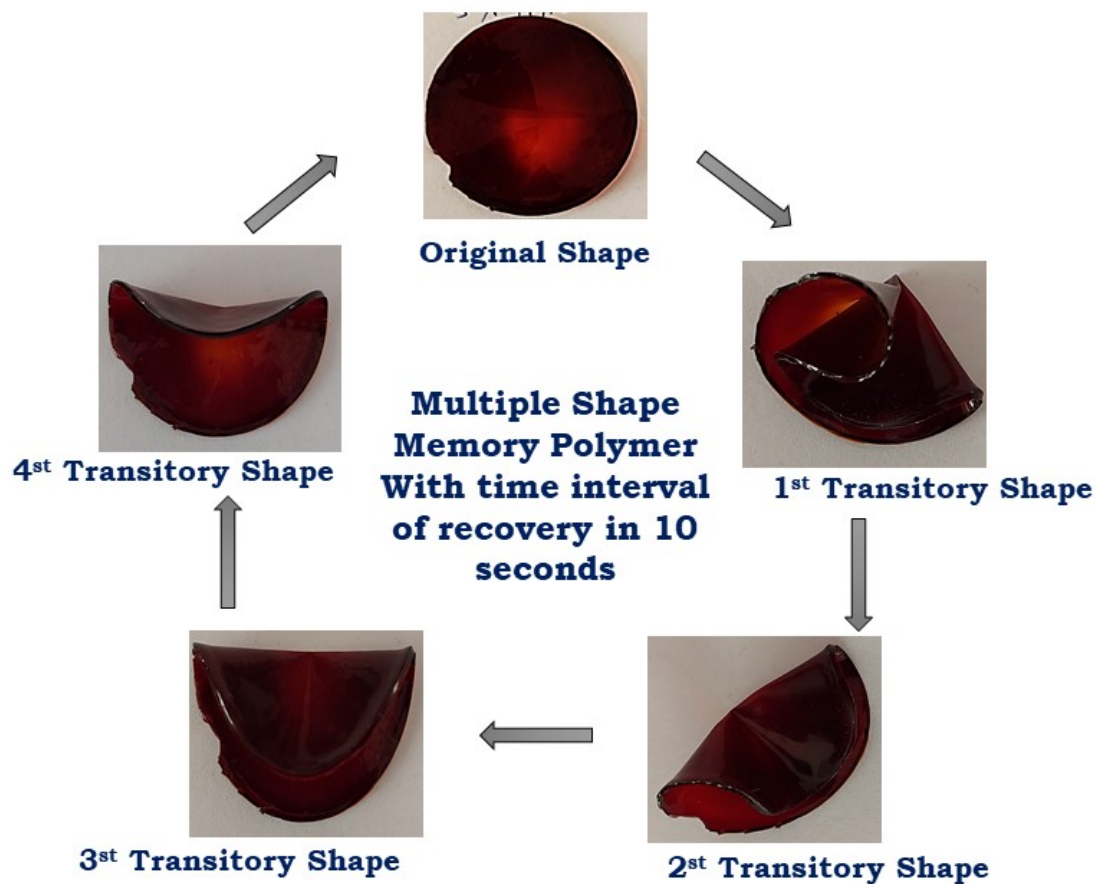

**Figure S2:** Photographs of poly[E-3ap-co-SH(10%)] composite indicating shape memory properties.

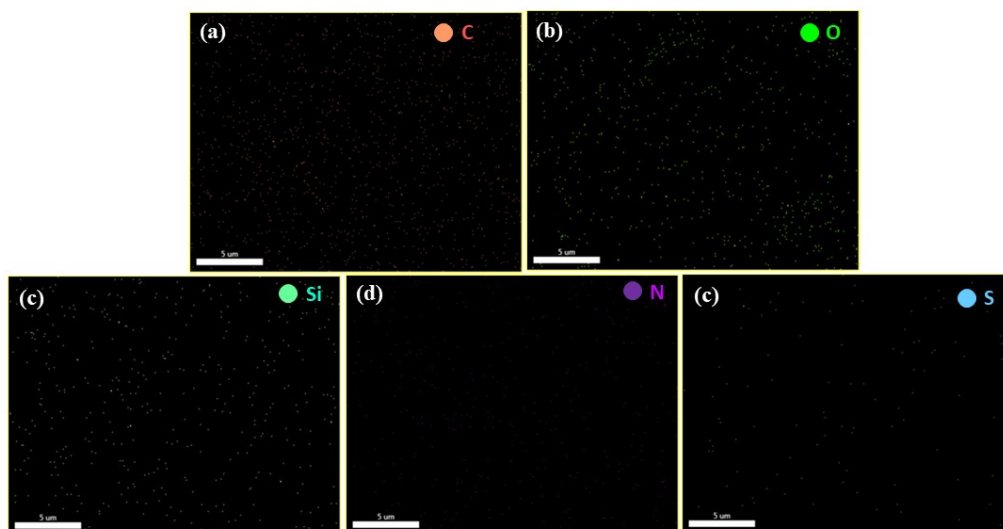

**Figure S3:** Elemental Mapping of (a) carbon, (b) oxygen, (c) sulphur, (d) nitrogen and (e) silica for Poly[E-3ap-co-SH(10%)/BS<sub>5</sub>]

**Table S1:** Elemental compositions (Wt.%) of the polymer composites determined by EDX technique.

| Sample                                  | Elemental Composition (wt. %) |       |       |      |      |
|-----------------------------------------|-------------------------------|-------|-------|------|------|
|                                         | C                             | O     | Si    | N    | S    |
| Poly[E-3ap-co-SH(10%)/BS <sub>1</sub> ] | 57.66                         | 34.20 | 5.59  | 1.92 | 0.63 |
| Poly[E-3ap-co-SH(10%)/BS <sub>3</sub> ] | 53.78                         | 34.42 | 8.74  | 2.27 | 0.79 |
| Poly[E-3ap-co-SH(10%)/BS <sub>5</sub> ] | 52.52                         | 33.96 | 10.03 | 2.51 | 0.98 |

### Optical microscopy

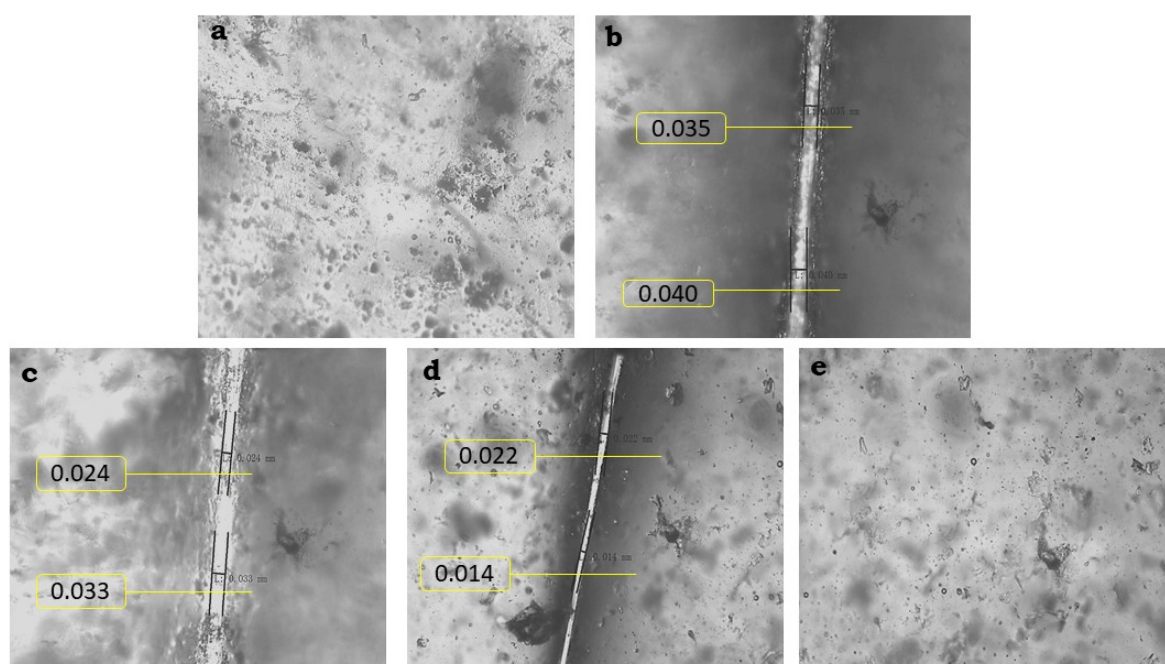

**Figure S4:** optical microscopy images of poly[E-3ap-co-SH(15%)] (a) neat, (b) damaged, (c) after 2h, (d) after 4h and (e) after 6h.

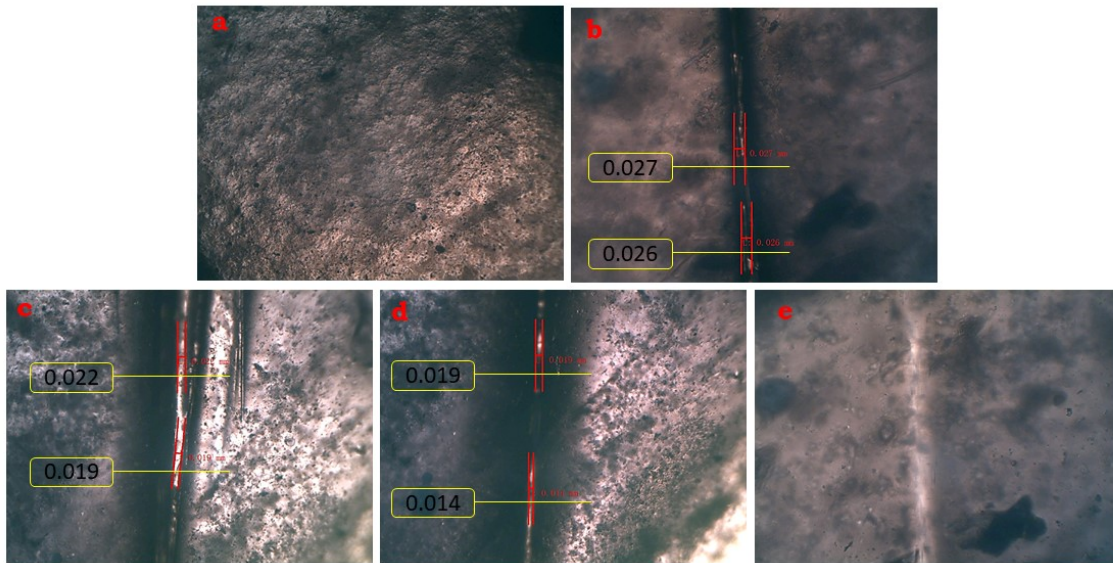

**Figure S5:** optical microscopy images of poly[E-3ap-co-SH(15%)] (a) neat, (b) damaged, (c) after 2h, (d) after 4h and (e) after 24h.

### Mechanical/tensile test

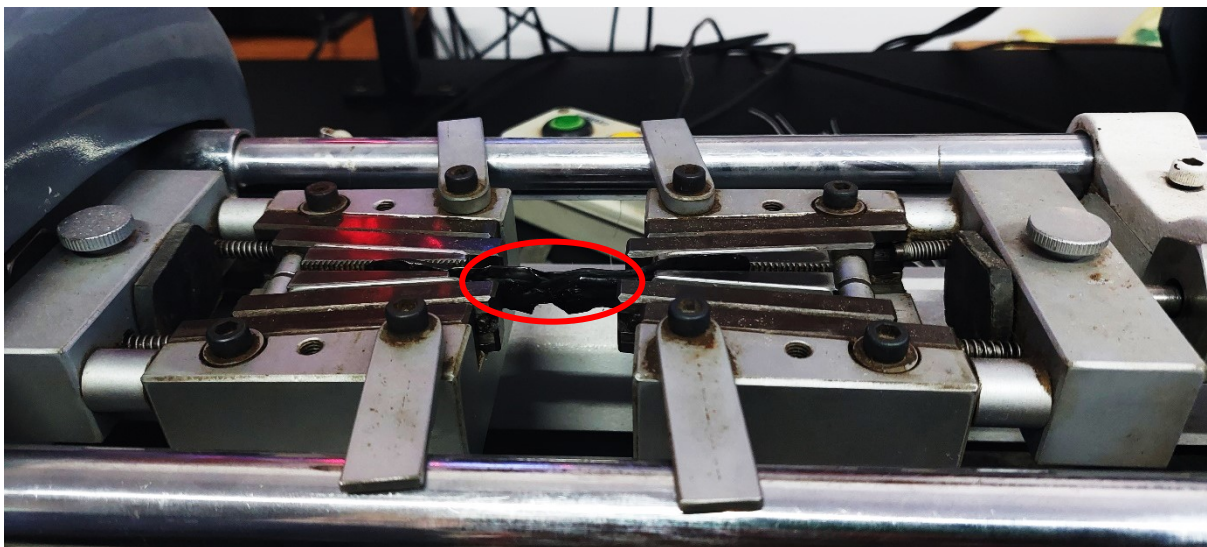

**Figure S6:** Tensile/flexural sampling.
